# Supplementary material for: Viridicatol Isolated from Deep-Sea Penicillium Griseofulvum Alleviates Anaphylaxis and Repairs the Intestinal Barrier in Mice by Suppressing Mast Cell Activation
Source: MDPI journal article supplement (doi:10.3390/md18100517), 2020-10-16
Supplement: s1 [file s1]

## **Supplementary Methods**

HRESIMS spectra were conducted on a Xevo G2 Q-TOF mass spectrometer (Waters Corporation, Milford, MA, USA). NMR spectra were recorded on a Bruker 400 MHz spectrometer (Bruker, Fällanden, Switzerland).

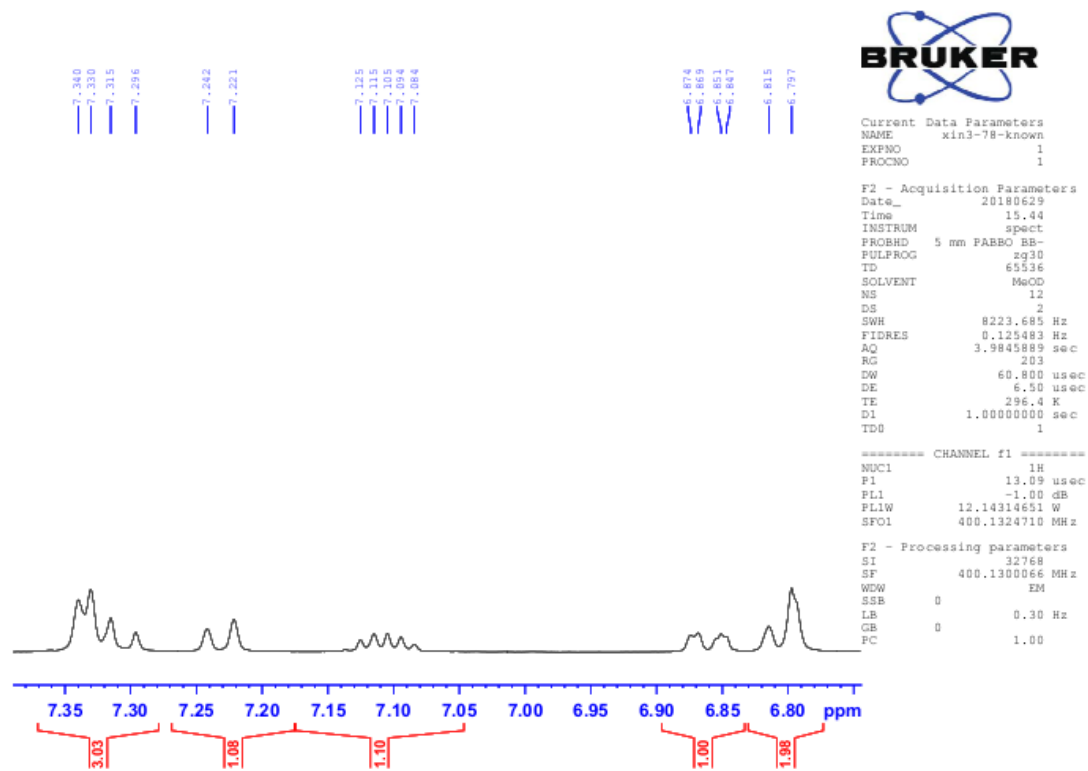

**Fig. S1.**  $^1\text{H}$  NMR spectrum of viridicatol in  $\text{CD}_3\text{OD}$  (400 MHz).

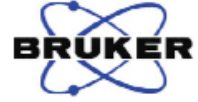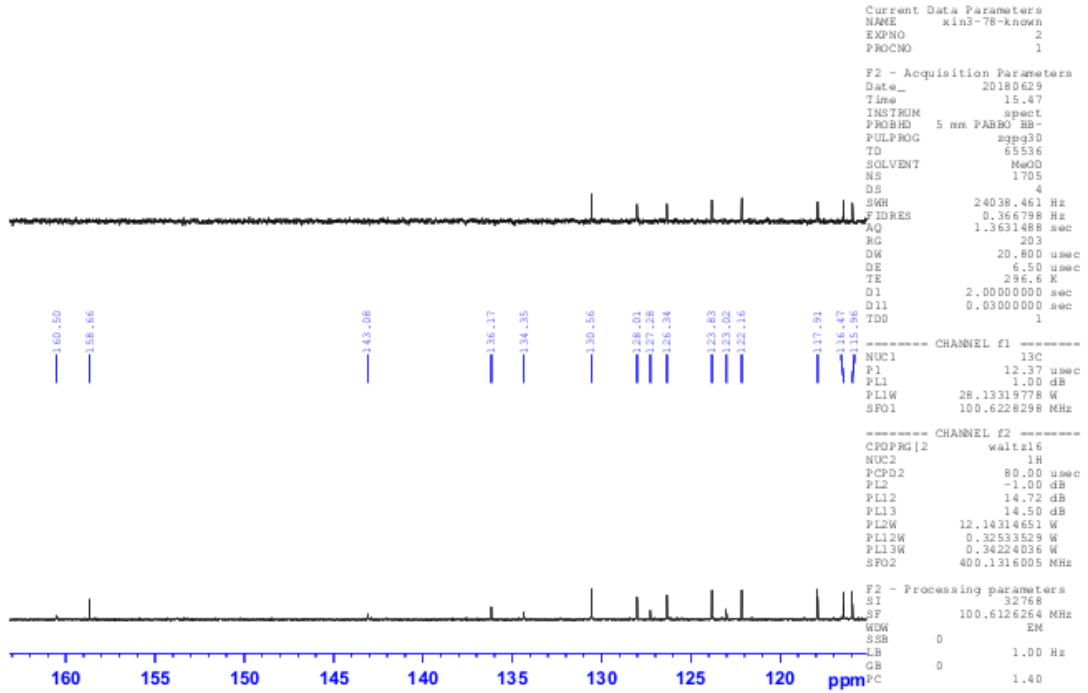

**Fig. S2.**  $^{13}\text{C}$  NMR spectrum of viridicatol in  $\text{CD}_3\text{OD}$  (100 MHz).

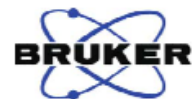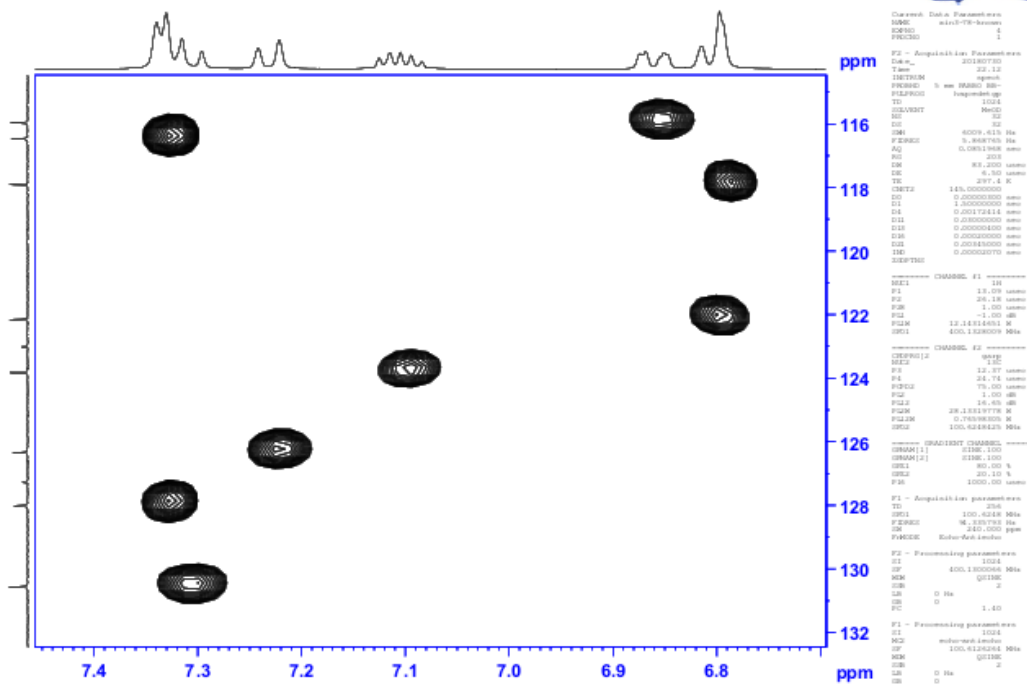

Figure S3. HSQC spectrum of viridicatol in CD<sub>3</sub>OD.

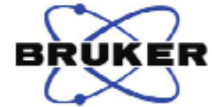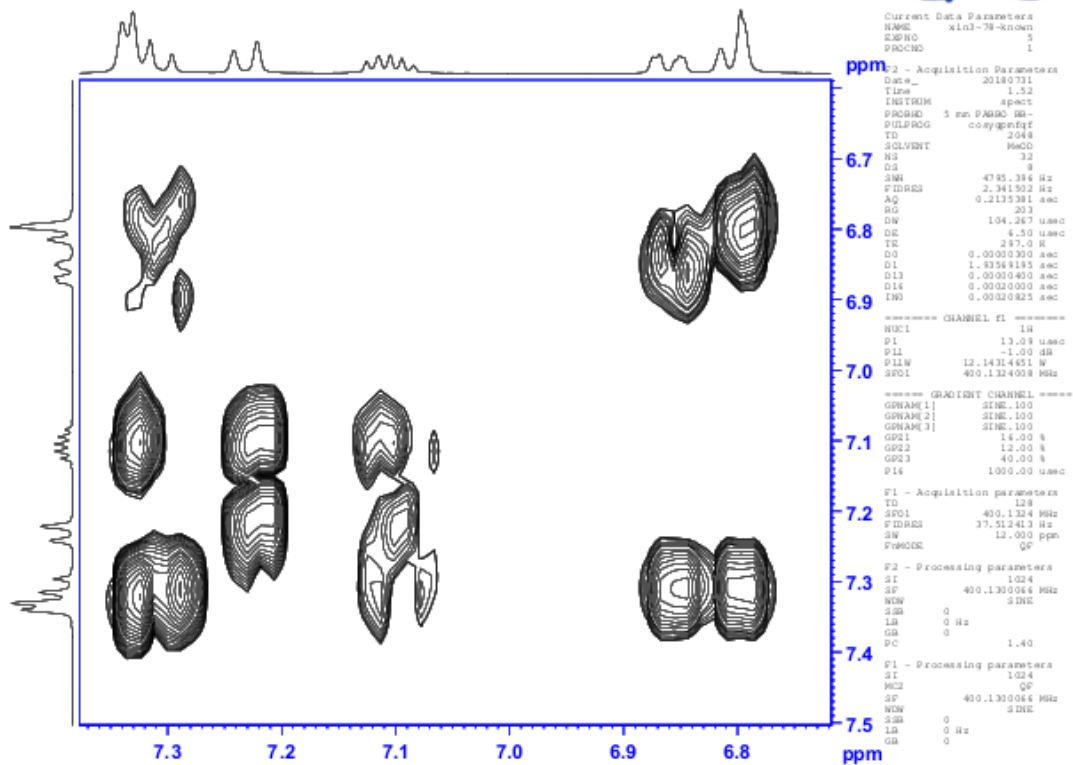

Fig. S4. COSY spectrum of viridicatol in CD<sub>3</sub>OD.

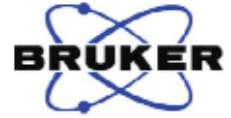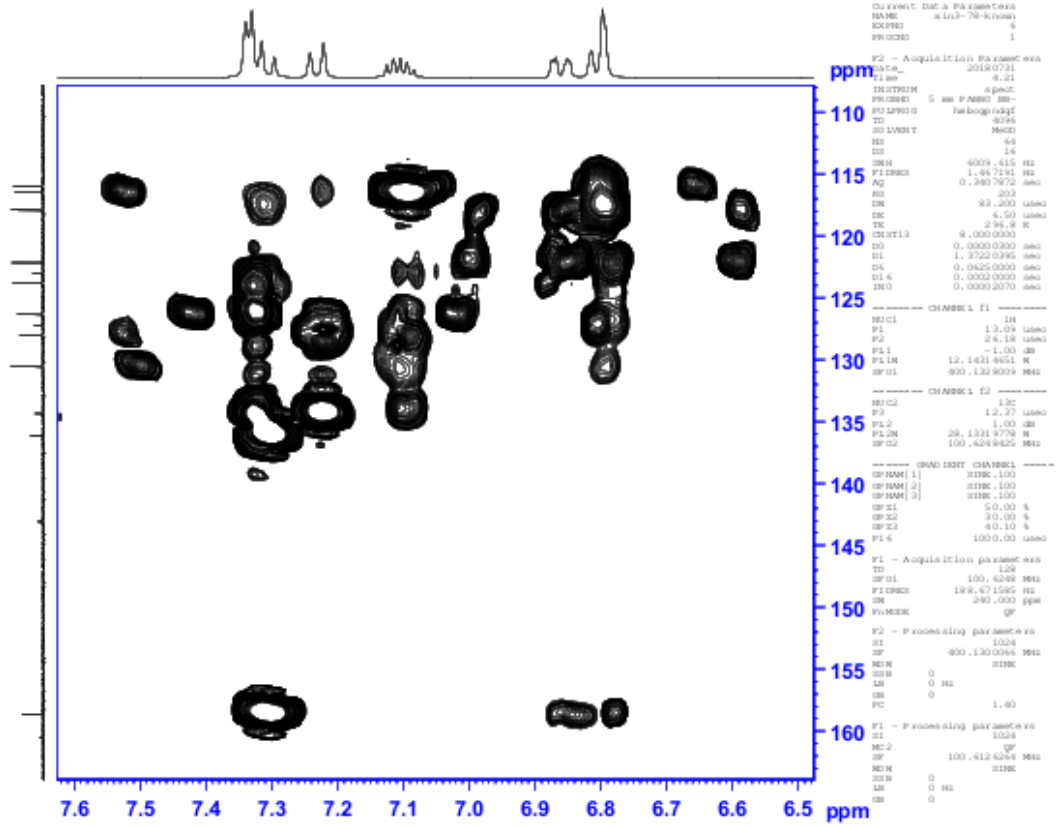

Fig. S5. HMBC spectrum of viridicatol in CD<sub>3</sub>OD.

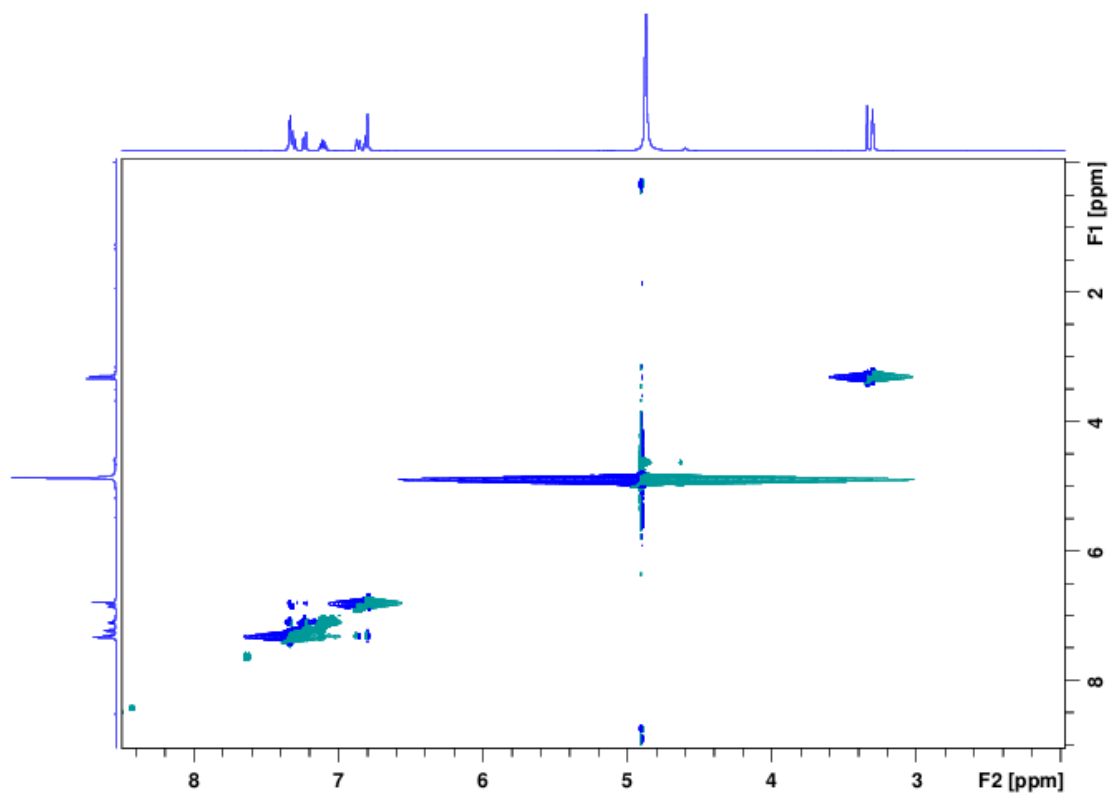

**Fig. S6.** NOESY spectrum of viridicatol in CD<sub>3</sub>OD.

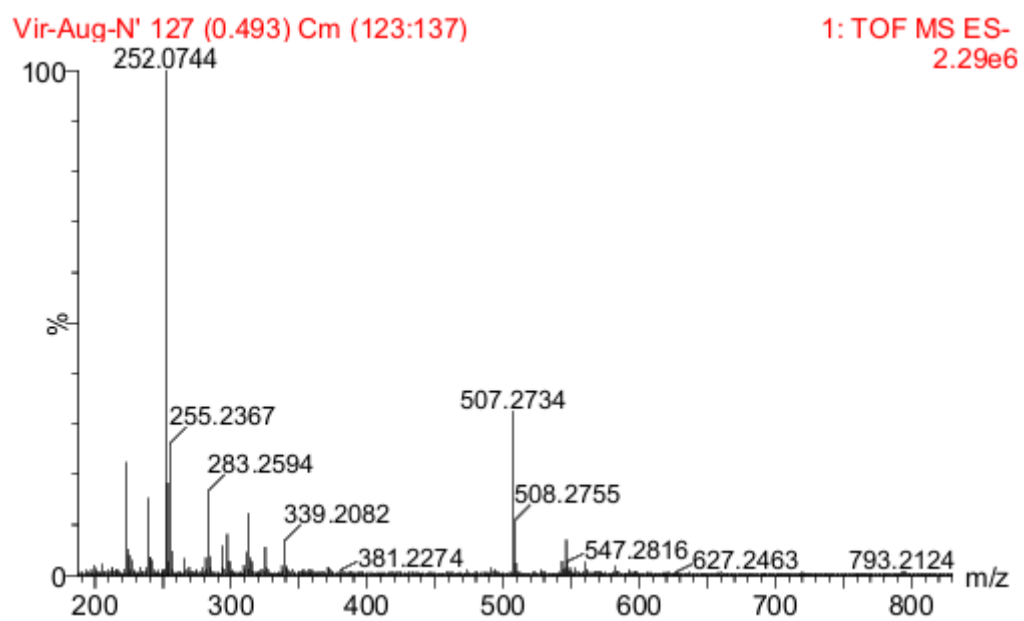

**Fig. S7.** The HR-ESI-MS spectrum of viridicatol.
